# Supplementary material for: Increased n-6 Polyunsaturated Fatty Acids Indicate Pro- and Anti-Inflammatory Lipid Modifications in Synovial Membranes with Rheumatoid Arthritis
Source: Springer Nature journal article supplement (doi:10.1007/s10753-023-01816-3), 2023-05-04

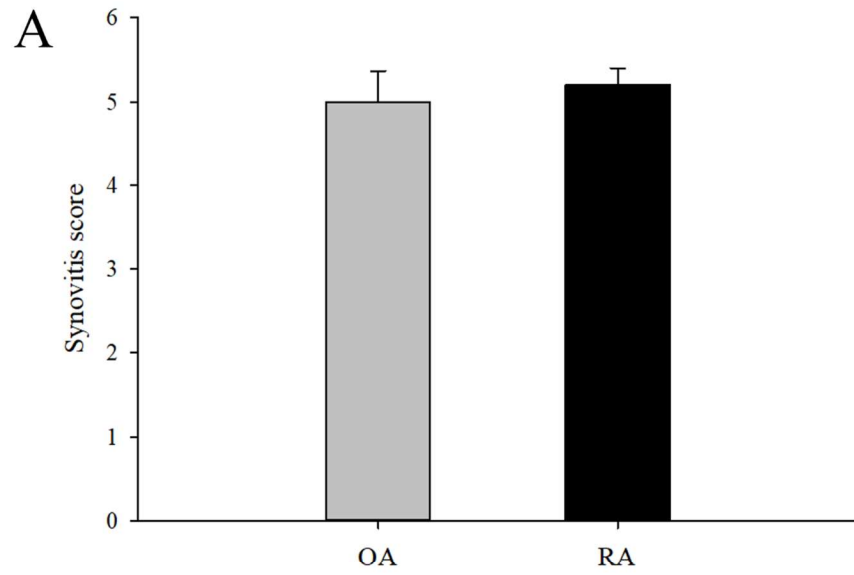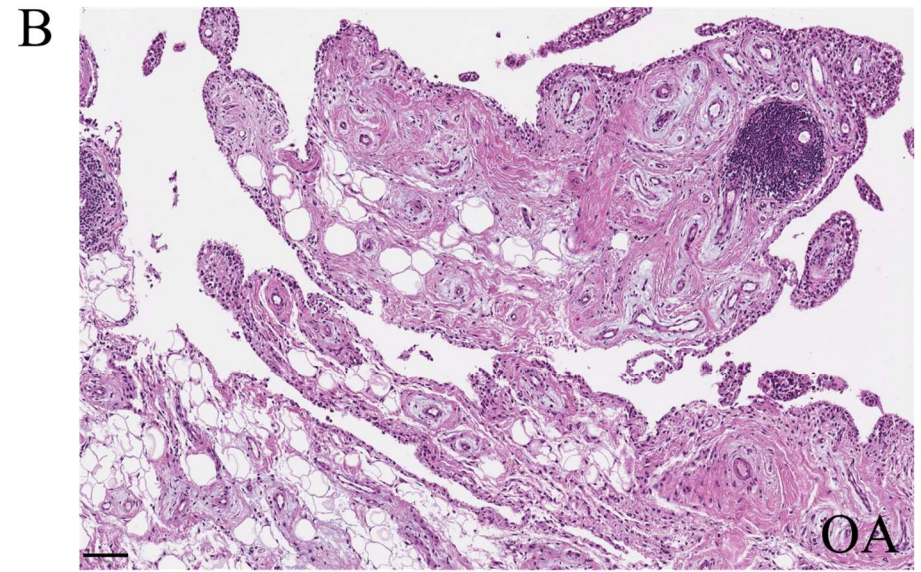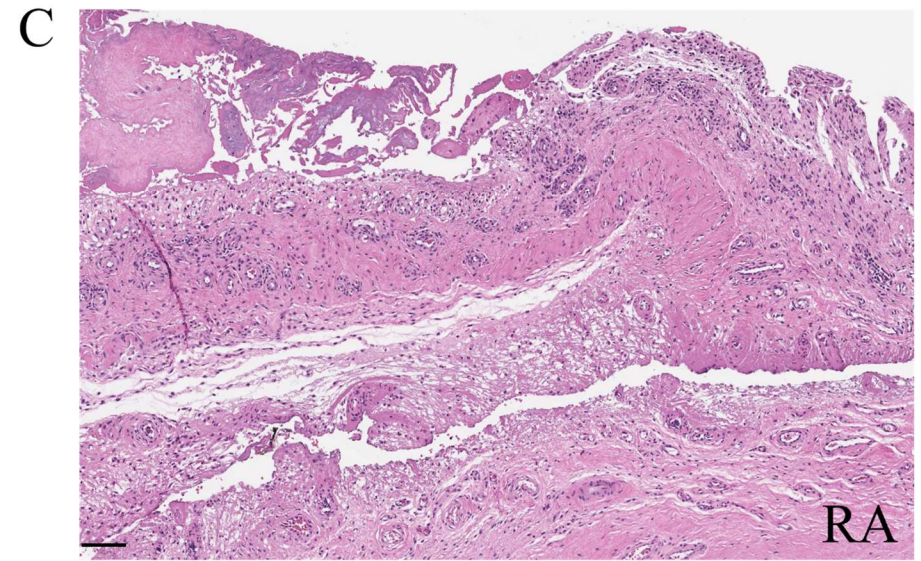

Supplement: MOESM1 [file 25318878]
