# Supplementary material for: Increased n-6 Polyunsaturated Fatty Acids Indicate Pro- and Anti-Inflammatory Lipid Modifications in Synovial Membranes with Rheumatoid Arthritis
Source: Springer Nature journal article supplement (doi:10.1007/s10753-023-01816-3), 2023-05-04
Supplement: MOESM6 [file 25318878]

**Supplementary Table S1.** Grouping of fatty acids, dimethyl acetals (DMAs, derivatives of plasmalogen phospholipid alkenyl chains), their sums, and derived ratios based on hierarchical clustering. Group 4 consists of 2 subgroups that were fused for biological reasons (short saturated fatty acids).

| <b><u>Group 1</u></b> |             | <b><u>Group 2</u></b> |              | <b><u>Group 3</u></b> |             |
|-----------------------|-------------|-----------------------|--------------|-----------------------|-------------|
| 16:1n-5               | CHEBI:35464 | 22:1n-7               | CHEBI:180035 | 16:1n-9               | CHEBI:35465 |
| 22:1n-9               | CHEBI:28792 | 20:4n-6               | CHEBI:15843  | 18:3n-3               | CHEBI:27432 |
| 22:0                  | CHEBI:28941 | Sum DMA               |              | 18:1n-9               | CHEBI:16196 |
| 24:1n-9               | CHEBI:44247 | DMA 18:0              |              | Sum MUFA              |             |
| 22:1n-11              | CHEBI:32428 | 20:3n-6               | CHEBI:53486  | 14:1n-5               | CHEBI:27781 |
| 18:3n-6               | CHEBI:28661 | 18:0                  | CHEBI:28842  | 16:1n-7               | CHEBI:28716 |
| 24:0                  | CHEBI:28866 | 20:0                  | CHEBI:28822  | 18:1n-7               | CHEBI:50464 |
|                       |             | 18:2n-6               | CHEBI:17351  | 17:1n-8               | CHEBI:84328 |
|                       |             | 22:4n-6               | CHEBI:53487  | UFA/SFA ratio         |             |
|                       |             | Sum PUFA              |              |                       |             |
|                       |             | Sum n-6 PUFA          |              |                       |             |
|                       |             | 20:5n-3               | CHEBI:28364  |                       |             |
|                       |             | Sum n-3 PUFA          |              |                       |             |
|                       |             | 22:5n-3               | CHEBI:53488  |                       |             |
|                       |             | 22:6n-3               | CHEBI:28125  |                       |             |
| <br>                  |             |                       |              |                       |             |
| <b><u>Group 4</u></b> |             | <b><u>Group 5</u></b> |              |                       |             |
| 15:0 iso              | CHEBI:39250 | 18:1n-5               | CHEBI:82617  |                       |             |
| 15:0 anteiso          | CHEBI:39251 | n-3/n-6 PUFA ratio    |              |                       |             |
| DMA 16:0              |             | 20:1n-9               | CHEBI:32425  |                       |             |
| 14:0                  | CHEBI:28875 | 17:0 anteiso          | CHEBI:84874  |                       |             |
| 15:0                  | CHEBI:42504 | 17:0 iso              | CHEBI:70850  |                       |             |
| 16:0                  | CHEBI:15756 | 17:0                  | CHEBI:32365  |                       |             |
| Sum SFA               |             |                       |              |                       |             |

ChEBI (Chemical Entities of Biological Interest) IDs from <https://www.ebi.ac.uk/chebi/>
