# Supplementary material for: Increased n-6 Polyunsaturated Fatty Acids Indicate Pro- and Anti-Inflammatory Lipid Modifications in Synovial Membranes with Rheumatoid Arthritis
Source: Springer Nature journal article supplement (doi:10.1007/s10753-023-01816-3), 2023-05-04
Supplement: MOESM7 [file 25318878]

**Supplementary Table S2.** Proportions (mol-%) of fatty acids and alkenyl chains (detected as dimethyl acetal derivatives DMAs), listed in the order of retention times of chromatographic peaks, and their sums and ratios in the synovium of rheumatoid arthritis (RA) and osteoarthritis (OA) patients (mean  $\pm$  SE).

| <b>Fatty acid</b> | <b>RA</b>          | <b>OA</b>          | <b><i>P</i><sup>a</sup></b> |
|-------------------|--------------------|--------------------|-----------------------------|
| 14:0              | 2.450 $\pm$ 0.257  | 3.942 $\pm$ 0.536  | 0.010                       |
| 14:1n-5           | 0.589 $\pm$ 0.147  | 0.753 $\pm$ 0.163  | 0.505                       |
| 15:0 <i>i</i>     | 0.045 $\pm$ 0.007  | 0.058 $\pm$ 0.006  | 0.279                       |
| 15:0 <i>ai</i>    | 0.071 $\pm$ 0.010  | 0.093 $\pm$ 0.016  | 0.382                       |
| 15:0              | 0.232 $\pm$ 0.024  | 0.335 $\pm$ 0.040  | 0.050                       |
| DMA 16:0          | 0.070 $\pm$ 0.011  | 0.090 $\pm$ 0.023  | 0.721                       |
| 16:0              | 23.925 $\pm$ 0.892 | 25.690 $\pm$ 0.833 | 0.105                       |
| 16:1n-9           | 0.603 $\pm$ 0.088  | 0.702 $\pm$ 0.032  | 0.328                       |
| 16:1n-7           | 7.057 $\pm$ 1.328  | 8.209 $\pm$ 1.199  | 0.442                       |
| 16:1n-5           | 0.094 $\pm$ 0.015  | 0.065 $\pm$ 0.008  | 0.105                       |
| 17:0 <i>i</i>     | 0.123 $\pm$ 0.023  | 0.112 $\pm$ 0.006  | 0.959                       |
| 17:0 <i>ai</i>    | 0.160 $\pm$ 0.015  | 0.173 $\pm$ 0.008  | 0.442                       |
| 17:0              | 0.146 $\pm$ 0.023  | 0.173 $\pm$ 0.019  | 0.382                       |
| 17:1n-8           | 0.255 $\pm$ 0.029  | 0.293 $\pm$ 0.020  | 0.234                       |
| DMA 18:0          | 0.480 $\pm$ 0.194  | 0.052 $\pm$ 0.016  | 0.003                       |
| 18:0              | 6.399 $\pm$ 1.618  | 3.363 $\pm$ 0.443  | 0.234                       |
| 18:1n-9           | 35.566 $\pm$ 2.385 | 40.399 $\pm$ 2.249 | 0.130                       |
| 18:1n-7           | 3.196 $\pm$ 0.248  | 2.977 $\pm$ 0.116  | 0.645                       |
| 18:1n-5           | 0.155 $\pm$ 0.034  | 0.155 $\pm$ 0.020  | 0.645                       |
| 18:2n-6           | 9.886 $\pm$ 0.747  | 8.640 $\pm$ 0.990  | 0.279                       |
| 18:3n-6           | 0.062 $\pm$ 0.007  | 0.043 $\pm$ 0.007  | 0.083                       |
| 18:3n-3           | 0.790 $\pm$ 0.137  | 0.873 $\pm$ 0.103  | 0.442                       |
| 20:0              | 0.099 $\pm$ 0.025  | 0.043 $\pm$ 0.003  | 0.065                       |
| 20:1n-9           | 0.427 $\pm$ 0.030  | 0.381 $\pm$ 0.064  | 0.959                       |
| 20:3n-6           | 0.542 $\pm$ 0.160  | 0.162 $\pm$ 0.018  | 0.001                       |
| 20:4n-6           | 3.733 $\pm$ 1.220  | 0.835 $\pm$ 0.273  | 0.028                       |
| 20:5n-3           | 0.286 $\pm$ 0.071  | 0.157 $\pm$ 0.031  | 0.130                       |
| 22:0              | 0.108 $\pm$ 0.045  | 0.015 $\pm$ 0.003  | 0.010                       |
| 22:1n-11          | 0.007 $\pm$ 0.002  | 0.005 $\pm$ 0.001  | 0.279                       |
| 22:1n-9           | 0.056 $\pm$ 0.014  | 0.019 $\pm$ 0.003  | 0.007                       |
| 22:1n-7           | 0.009 $\pm$ 0.003  | 0.004 $\pm$ 0.001  | 0.195                       |
| 22:4n-6           | 0.184 $\pm$ 0.139  | 0.098 $\pm$ 0.059  | 0.442                       |
| 22:5n-3           | 0.686 $\pm$ 0.134  | 0.407 $\pm$ 0.037  | 0.083                       |
| 24:0              | 0.154 $\pm$ 0.051  | 0.050 $\pm$ 0.028  | 0.065                       |
| 22:6n-3           | 1.107 $\pm$ 0.274  | 0.598 $\pm$ 0.089  | 0.161                       |
| 24:1n-9           | 0.247 $\pm$ 0.108  | 0.035 $\pm$ 0.011  | 0.028                       |
| $\Sigma$ SFA      | 33.912 $\pm$ 1.200 | 34.048 $\pm$ 1.448 | 1.000                       |
| $\Sigma$ MUFA     | 48.259 $\pm$ 3.382 | 53.996 $\pm$ 2.466 | 0.234                       |
| $\Sigma$ PUFA     | 17.278 $\pm$ 2.304 | 11.814 $\pm$ 1.499 | 0.050                       |
| $\Sigma$ n-6 PUFA | 14.408 $\pm$ 1.904 | 9.778 $\pm$ 1.297  | 0.028                       |

|                               |                |                |       |
|-------------------------------|----------------|----------------|-------|
| $\Sigma$ n-3 PUFA             | 2.870 ± 0.446  | 2.036 ± 0.225  | 0.161 |
| $\Sigma$ DMA                  | 0.550 ± 0.200  | 0.142 ± 0.038  | 0.050 |
| UFA/SFA                       | 1.960 ± 0.112  | 1.973 ± 0.134  | 0.959 |
| n-3/n-6 PUFA                  | 0.197 ± 0.015  | 0.213 ± 0.014  | 0.645 |
| Prod/pred n-6 PUFA            | 0.415 ± 0.115  | 0.104 ± 0.018  | 0.007 |
| Prod/prec n-3 PUFA            | 2.333 ± 0.948  | 0.869 ± 0.103  | 0.105 |
| $\Delta$ 9-desaturation index | 1.443 ± 0.141  | 1.615 ± 0.142  | 0.721 |
| $\Delta$ 6-desaturation index | 0.006 ± 0.001  | 0.005 ± 0.001  | 0.130 |
| $\Delta$ 5-desaturation index | 6.205 ± 0.602  | 4.468 ± 0.956  | 0.130 |
| DBI                           | 0.994 ± 0.056  | 0.847 ± 0.025  | 0.028 |
| TACL                          | 17.438 ± 0.105 | 17.178 ± 0.030 | 0.028 |

*i* = *iso*-methyl-branch, *ai* = *anteiso*-methyl-branch, SFA = saturated fatty acid, MUFA = monounsaturated fatty acid, PUFA = polyunsaturated fatty acid, UFA = unsaturated fatty acid (MUFA + PUFA), prod = product, prec = precursor, DBI = double bond index, TACL = total average chain length, <sup>a</sup>Mann–Whitney U test
