# Supplementary material for: Increased n-6 Polyunsaturated Fatty Acids Indicate Pro- and Anti-Inflammatory Lipid Modifications in Synovial Membranes with Rheumatoid Arthritis
Source: Springer Nature journal article supplement (doi:10.1007/s10753-023-01816-3), 2023-05-04
Supplement: MOESM8 [file 25318878]

**Supplementary Table S3.** Medical data of the patients with rheumatoid arthritis.

| ID | Diagnosis year | Post-traumatic osteoarthritis                  | Anti-rheumatic medication               | Glucocorticoids    | Biological drugs | Analgesics         |
|----|----------------|------------------------------------------------|-----------------------------------------|--------------------|------------------|--------------------|
| 1  | 1993           |                                                | hydroxychloroquine, podophyllotoxin     | methylprednisolone |                  | P.R.N.             |
| 2  | 1972           |                                                | none for several months                 | methylprednisolone |                  | P.R.N.             |
| 3  | 2005           |                                                | salazosulfapyridine, leflunomide        |                    |                  | P.R.N.             |
| 4  | 2016           |                                                | methotrexate, folic acid                | methylprednisolone |                  | P.R.N.             |
| 5  | 2001           |                                                | leflunomide                             | methylprednisolone |                  | P.R.N.             |
| 6  | 1983           |                                                | salazosulfapyridine, hydroxychloroquine |                    |                  | paracetamol P.R.N. |
| 7  | 2007           |                                                | salazosulfapyridine                     | methylprednisolone |                  |                    |
| 8  | 1996           | Open arthrotomy with debridement during 1970's | methotrexate, folic acid                | methylprednisolone | adalimumab       | paracetamol P.R.N. |

P.R.N. = pro re nata
